# Supplementary material
Source: Springer Nature journal article supplement (https://www.springermedizin.de/resource/supplementary/12885_2010_2571_MOESM7_ESM.pdf/9462586)

**A**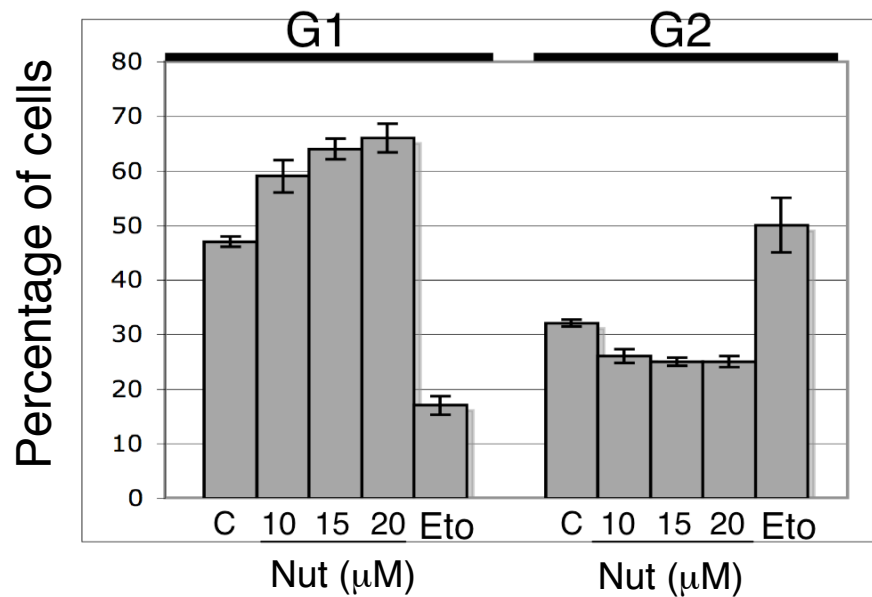**HCT116 p53<sup>+/+</sup>****B**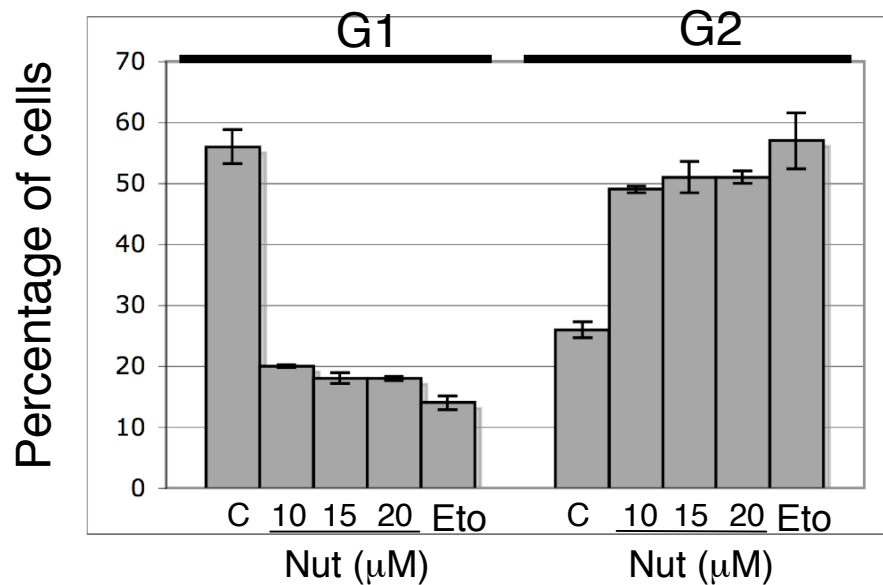**HCT116 p53<sup>-/-</sup>**

Supplement: MOESM7 [file 9462586]
